# Supplementary material for: Genome-wide analysis of gene regulation mechanisms during Drosophila spermatogenesis
Source: PubMed Central journal article supplement (PMC5879934; doi:10.1186/s13072-018-0183-3), 2018-04-02
Supplement: 13072_2018_183_MOESM12_ESM.pdf [file 13072_2018_183_MOESM12_ESM.pdf]

*CG9879*

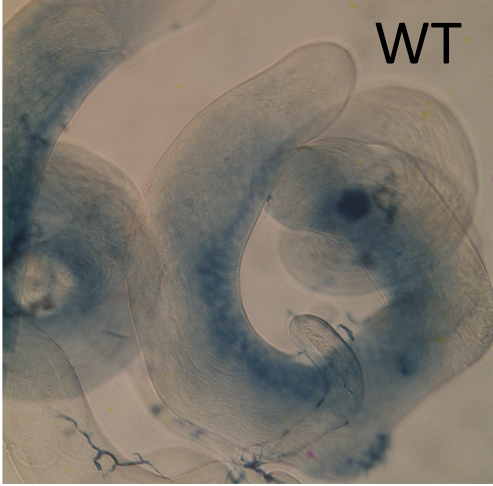

WT

*TRF2*

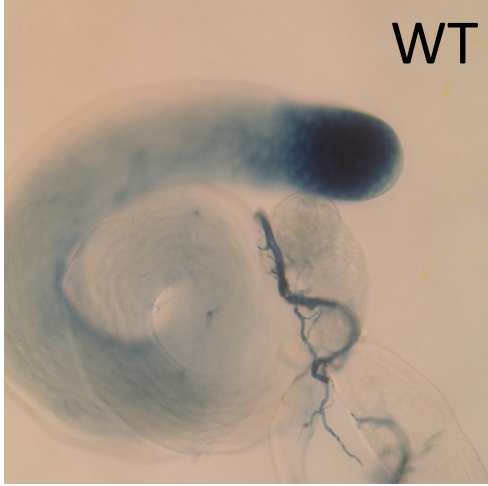

WT

*TRF*

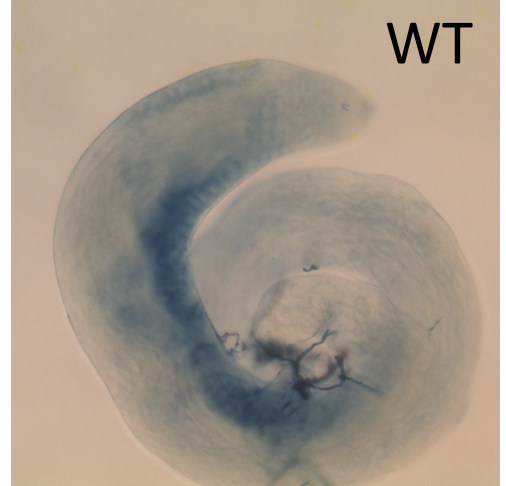

WT

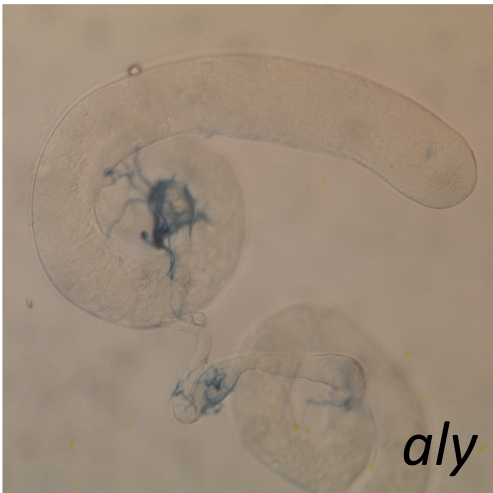

*aly*

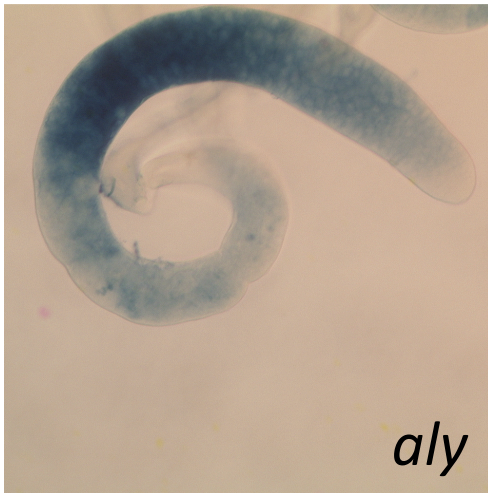

*aly*

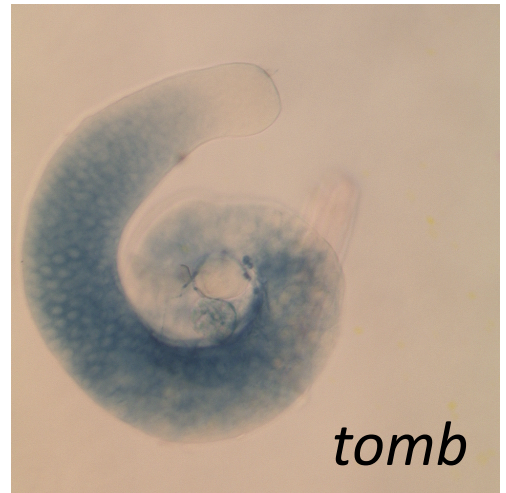

*tomb*
